# Supplementary material
Source: PubMed Central journal article supplement (PMC5001918)
Supplement: NIHMS802779-supplement-Graphic_Abstract.pdf [file NIHMS802779-supplement-Graphic_Abstract.pdf]

## Features of chemokine- and antigen-driven transendothelial migration

|                    | CD4 Effector Memory |                      | CD8 Effector Memory |                      |
|--------------------|---------------------|----------------------|---------------------|----------------------|
|                    | Chemokine           | Antigen              | Chemokine           | Antigen              |
| signal             | Chemokine           | Antigen              | Chemokine           | Antigen              |
| shape              | flattened           | rounded up           | flattened           | rounded up           |
| kinetics           | fast                | very slow            | fast                | slow                 |
| MTOC position      | follows the nucleus | precedes the nucleus | follows the nucleus | precedes the nucleus |
| Granule exocytosis | -                   | +++                  | +                   | -                    |
| Myosin IIA         | -                   | +                    | -                   | +                    |
| ICAM-1             | -                   | ++++                 | ++                  | ++++                 |
| VCAM-1             | -                   | ++                   | -                   | -                    |
| LFA-1              | +                   | +                    | +/-                 | +                    |
| VLA-4              | -                   | ++                   | -                   | -                    |
| LBRC               | -                   | +++                  | -                   | -                    |
| JAM-A              | +                   | -                    | -                   | -                    |
